# Supplementary material for: Maintenance of somatic tissue regeneration with age in short‐ and long‐lived species of sea urchins
Source: PubMed Central journal article supplement (PMC4933669; doi:10.1111/acel.12487), 2016-04-20
Supplement: ACEL-15-778-s001.pdf [file ACEL-15-778-s001.pdf]

Total number of cells counted for BrdU analysis of sea urchin tissues

| BrdU | ALM   |       | ES     |        | RN     |        | Coel  |       |
|------|-------|-------|--------|--------|--------|--------|-------|-------|
|      | Young | Old   | Young  | Old    | Young  | Old    | Young | Old   |
| Lv   | 49589 | 37623 | 103294 | 98237  | 102649 | 121622 | 23015 | 10950 |
| Sp   | 36747 | 35335 | 94903  | 86915  | 114736 | 90319  | 13589 | 14048 |
| Mf   | 45891 | 37958 | 94724  | 103877 | 105334 | 72652  | 7073  | 9084  |

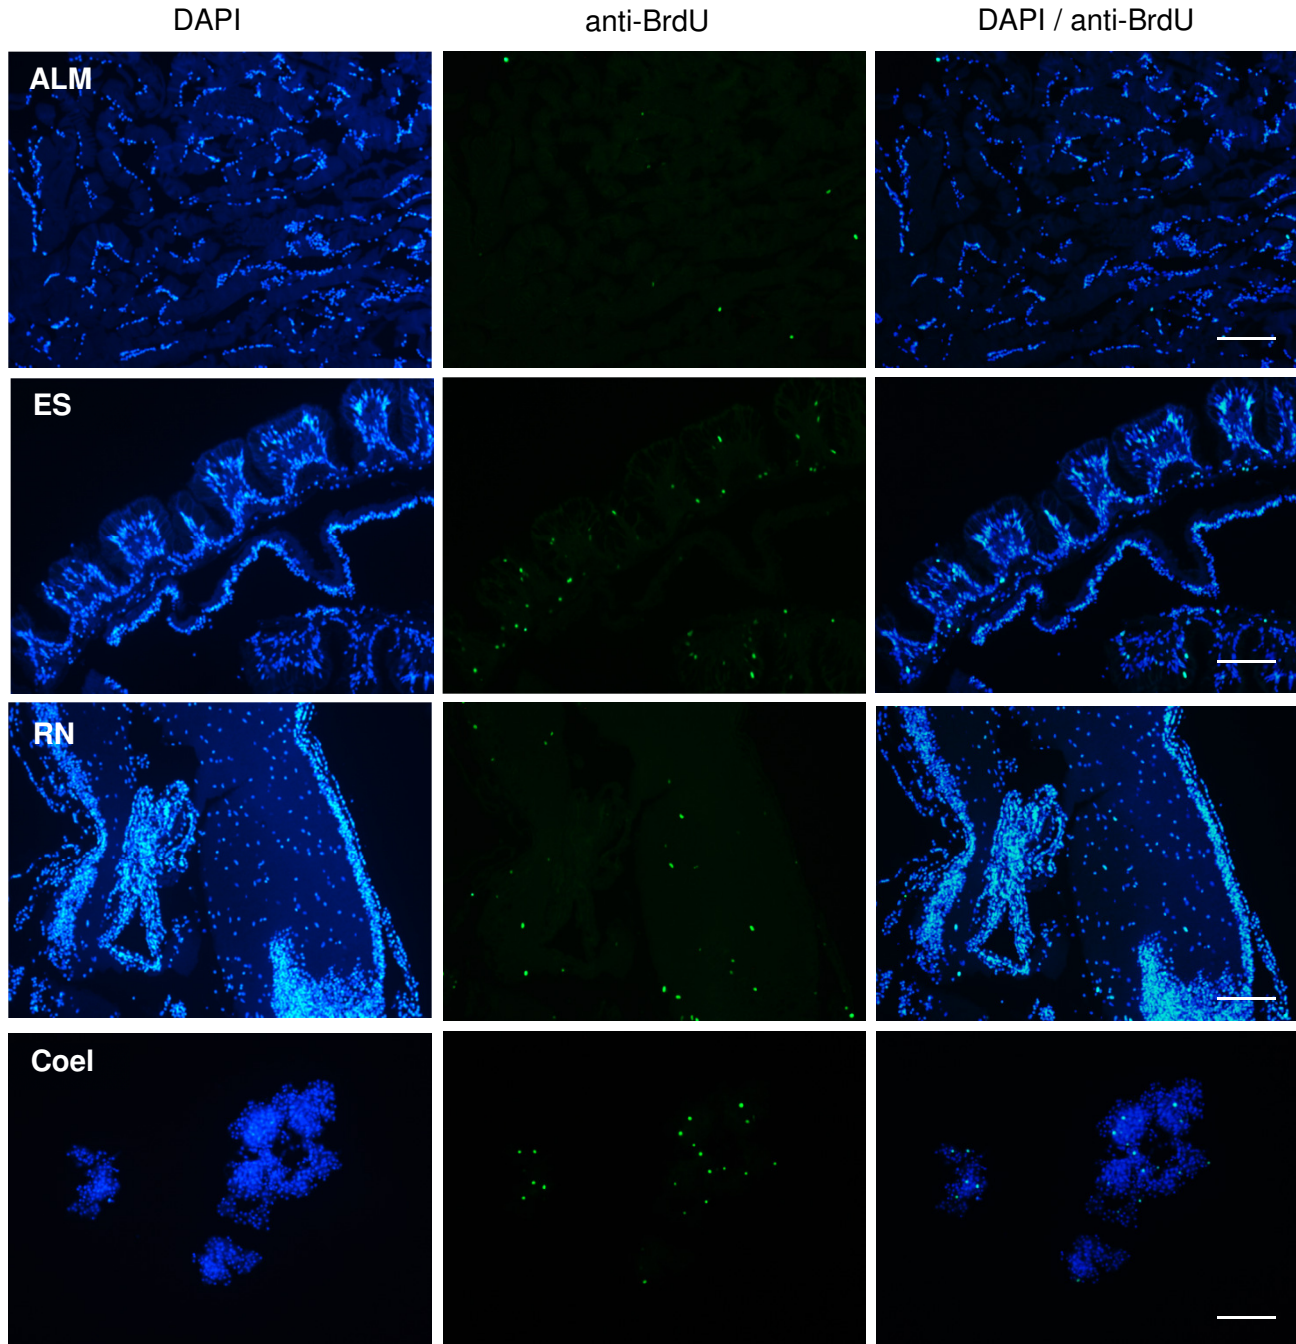

**Fig. S1** Total number of cells counted and images for BrdU analysis of sea urchin tissues. Selection of images from *L. variegatus* tissues [Aristotle's lantern muscle (ALM), esophagus (ES), radial nerve (RN) and coelomocytes (Coel)] labeled with anti-BrdU or stained with DAPI. Scale bar represents 100  $\mu\text{m}$ .
