# Supplementary material for: Maintenance of somatic tissue regeneration with age in short‐ and long‐lived species of sea urchins
Source: PubMed Central journal article supplement (PMC4933669; doi:10.1111/acel.12487), 2016-04-20
Supplement: ACEL-15-778-s003.pdf [file ACEL-15-778-s003.pdf]

Total number of cells counted for Apo ssDNA analysis of sea urchin tissues

| Apo ssDNA | ALM   |       | ES    |       | RN    |       | Coel  |       |
|-----------|-------|-------|-------|-------|-------|-------|-------|-------|
|           | Young | Old   | Young | Old   | Young | Old   | Young | Old   |
| Lv        | 21276 | 19252 | 52411 | 53127 | 57974 | 52915 | 55246 | 36775 |
| Sp        | 22547 | 20553 | 43447 | 42757 | 46531 | 41968 | 24730 | 14902 |
| Mf        | 22467 | 21899 | 56367 | 57394 | 43720 | 30597 | 20044 | 20486 |

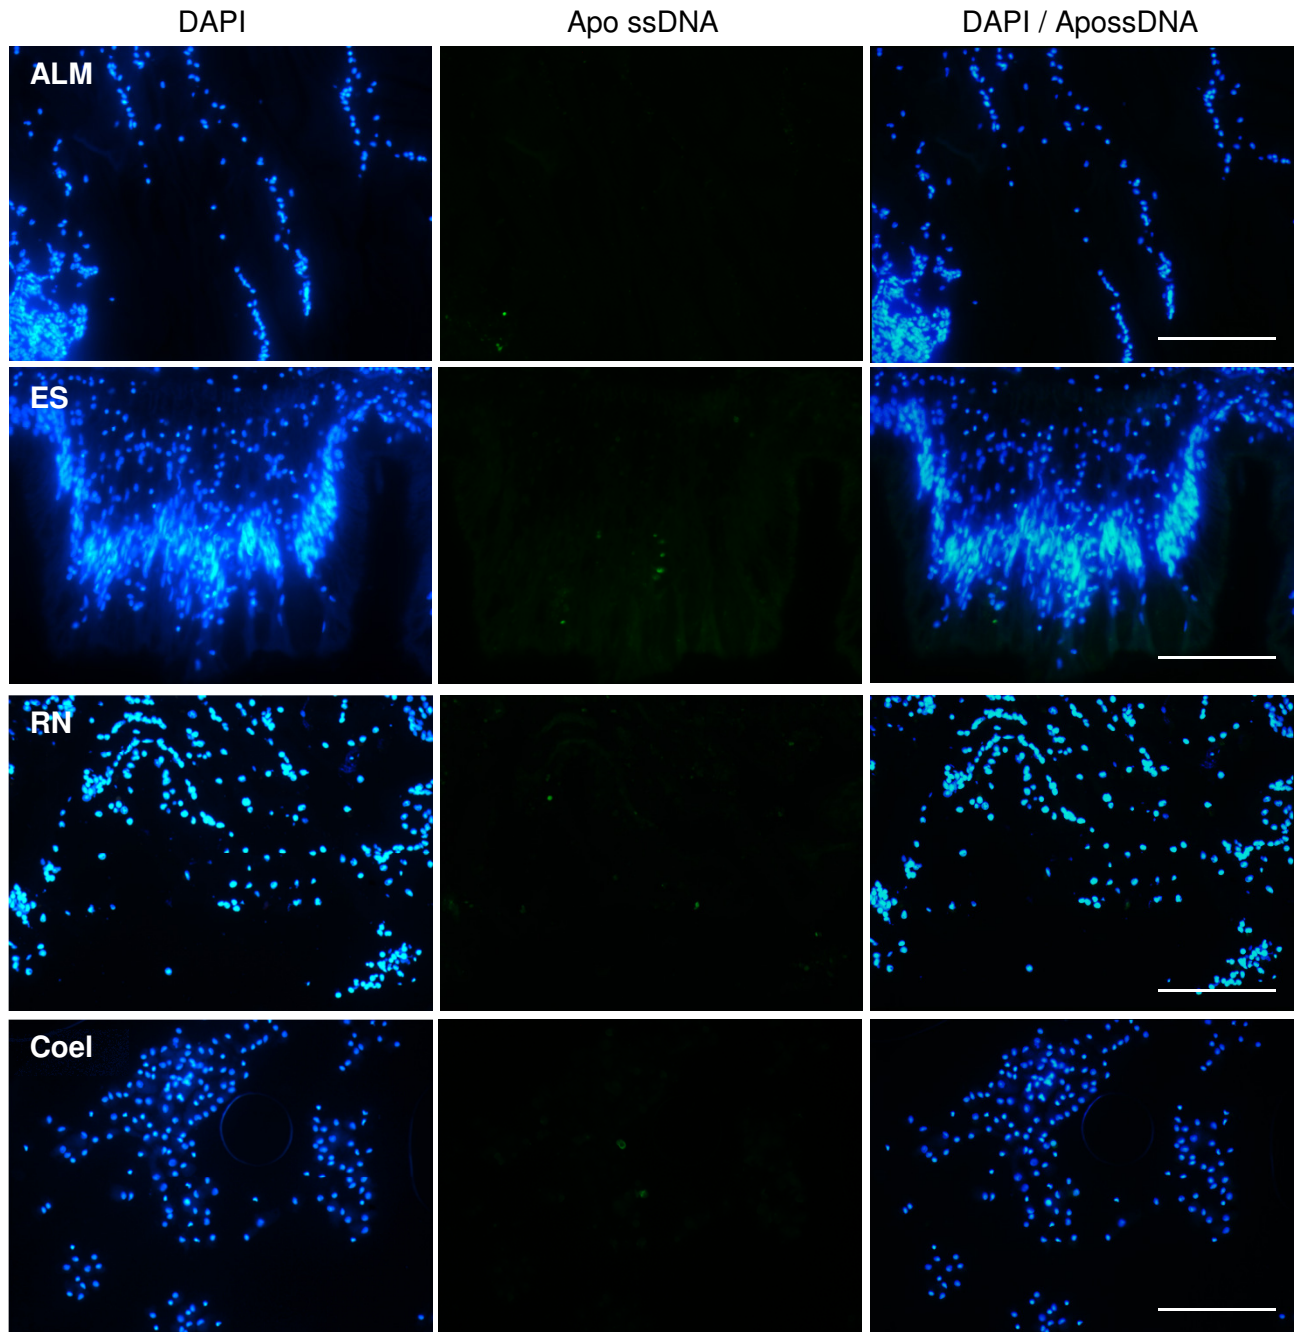

**Fig. S3** Total number of cells counted and images for Apo ssDNA analysis of sea urchin tissues. Selection of images from *L. variegatus* tissues [Aristotle's lantern muscle (ALM), esophagus (ES), radial nerve (RN) and coelomocytes (Coel)] developed using the Apo ssDNA assay and stained with DAPI. Scale bar represents 100 μm.
