# Supplementary material for: Maintenance of somatic tissue regeneration with age in short‐ and long‐lived species of sea urchins
Source: PubMed Central journal article supplement (PMC4933669; doi:10.1111/acel.12487), 2016-04-20
Supplement: ACEL-15-778-s004.pdf [file ACEL-15-778-s004.pdf]

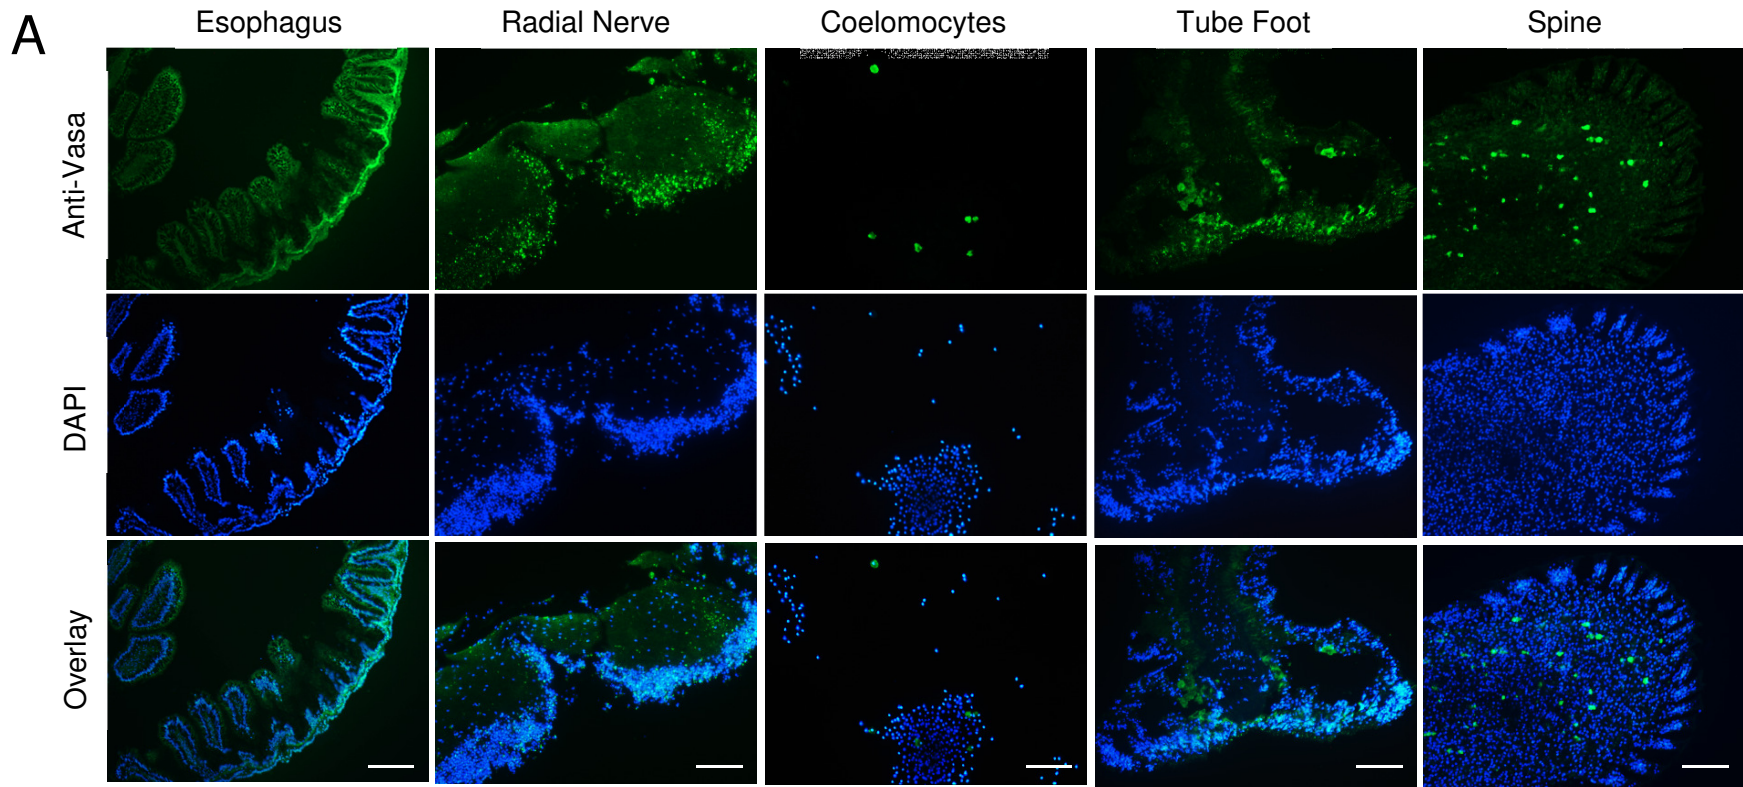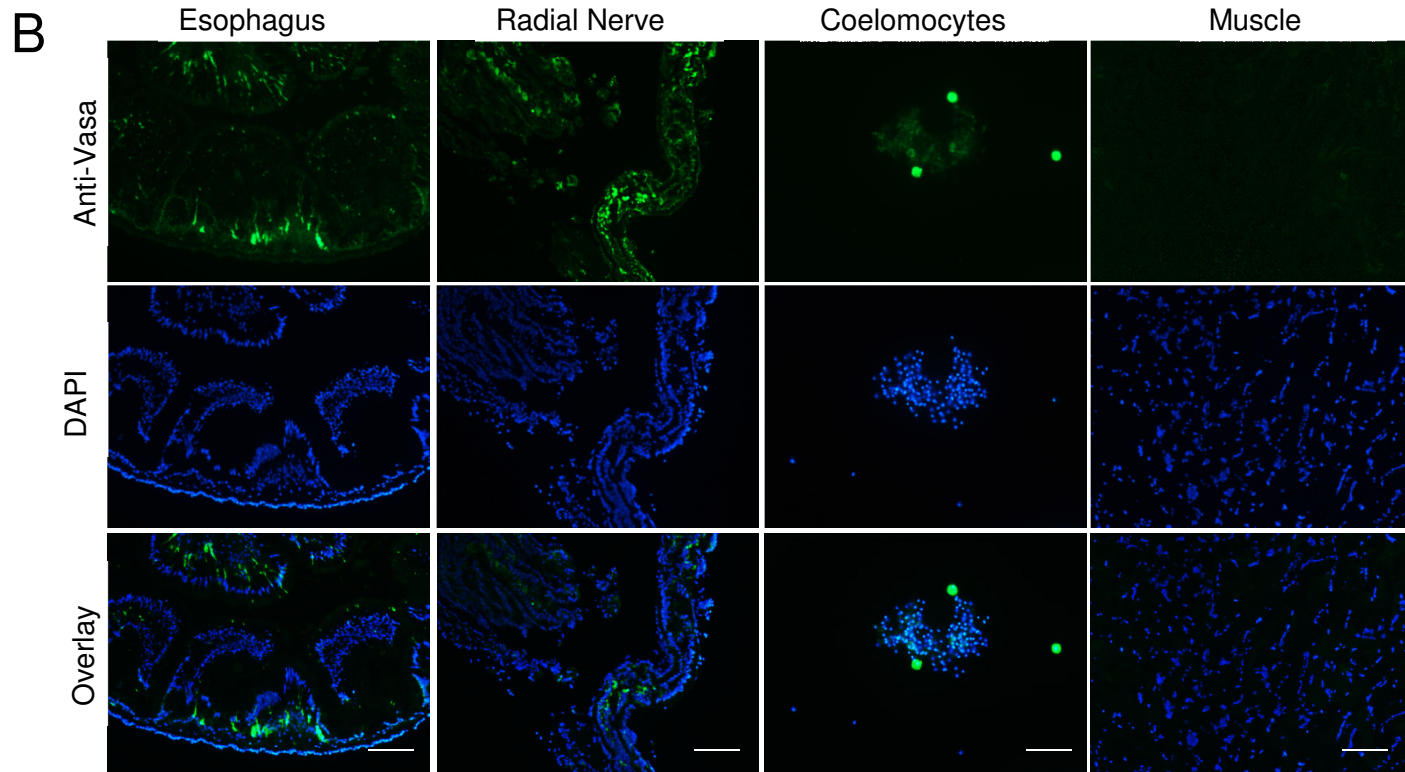

**Fig. S4**  
 Immunohistochemistry and immunocytochemistry of sea urchin tissues and cells using an antibody to Vasa. Panel A: *S. purpuratus*, Panel B: *M. franciscanus* tissues stained with DAPI or reacted with anti-Vasa antibody, visualized with DyLight™ 488 secondary antibody. Scale bar represents 100 μm.
