# Supplementary material for: Maintenance of somatic tissue regeneration with age in short‐ and long‐lived species of sea urchins
Source: PubMed Central journal article supplement (PMC4933669; doi:10.1111/acel.12487), 2016-04-20
Supplement: ACEL-15-778-s005.pdf [file ACEL-15-778-s005.pdf]

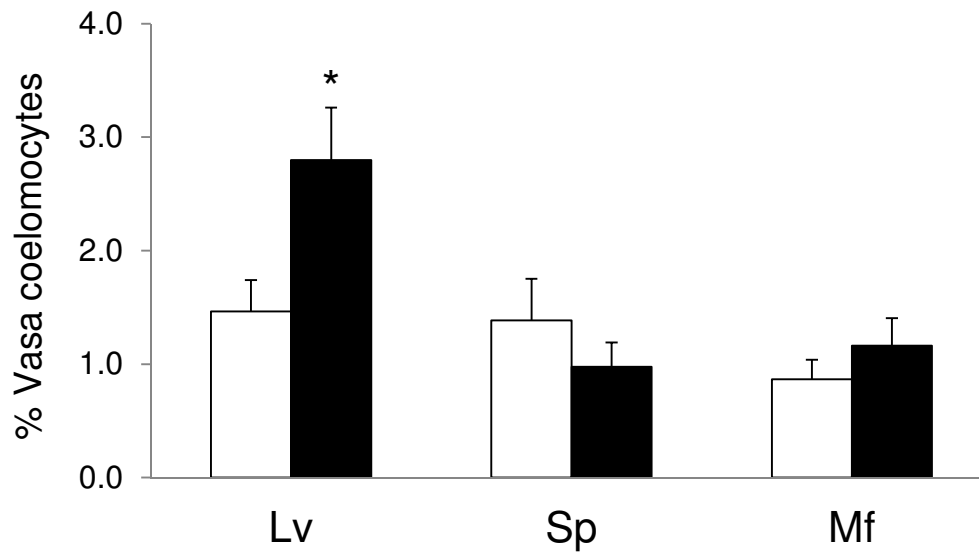

**Fig. S5** Percent of Vasa-positive coelomocytes from *L. variegatus* (Lv), *S. purpuratus* (Sp) and *M. franciscanus* (Mf). The white bars represent small/young animals and the black bars represent large/old animals. Age estimates and number of animals in each group are shown in Table 1. The data are presented as means and standard errors, and the star (\*) indicates a significant difference between age groups ( $p < 0.05$ ).
