# Supplementary material for: Maintenance of somatic tissue regeneration with age in short‐ and long‐lived species of sea urchins
Source: PubMed Central journal article supplement (PMC4933669; doi:10.1111/acel.12487), 2016-04-20
Supplement: ACEL-15-778-s006.pdf [file ACEL-15-778-s006.pdf]

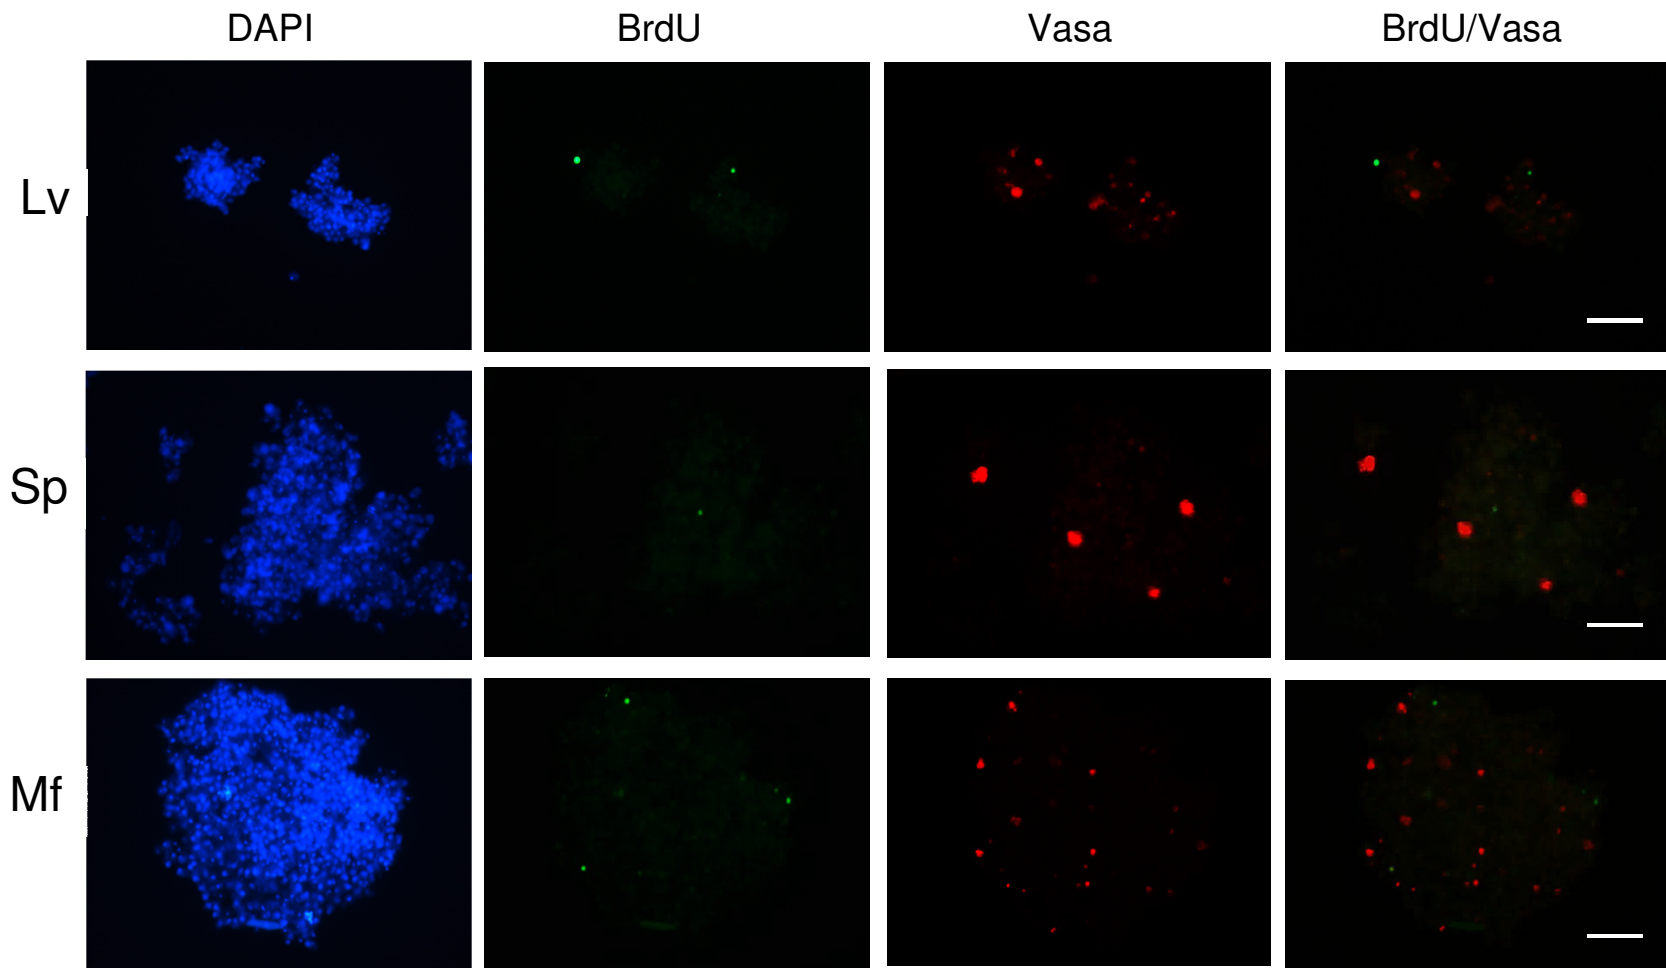

**Fig. S6** Immunocytochemistry of coelomocytes from BrdU-treated *L. variegatus* (Lv), *S. purpuratus* (Sp) and *M. franciscanus* (Mf) developed with anti-BrdU and anti-Vasa antibodies: BrdU-incorporation (anti-BrdU conjugated to Alexa Fluor® 488), Vasa immunostaining (anti-Vasa was detected with a DyLight™647 conjugated secondary antibody) and DAPI shows all nuclei. Scale bar represents 100  $\mu$ m.
