# Supplementary material for: Maintenance of somatic tissue regeneration with age in short‐ and long‐lived species of sea urchins
Source: PubMed Central journal article supplement (PMC4933669; doi:10.1111/acel.12487), 2016-04-20
Supplement: ACEL-15-778-s007.pdf [file ACEL-15-778-s007.pdf]

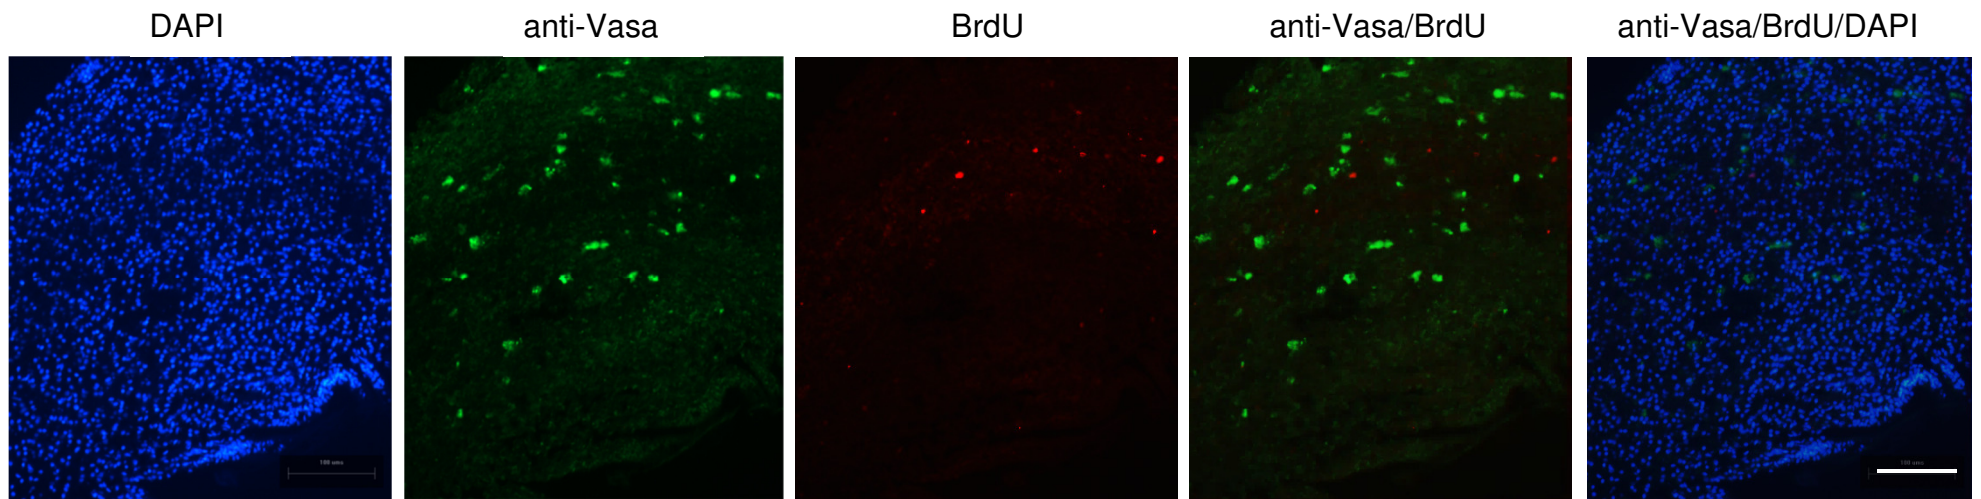

anti-Vasa/BrdU/DAPI

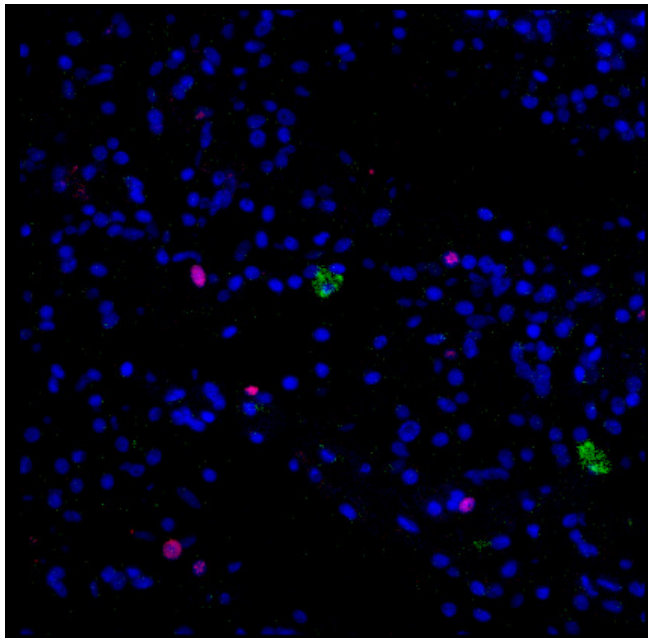

**Fig. S7** Immunohistochemistry of *S. purpuratus* spines showing BrdU-positive nuclei are distinct from Vasa-positive cells. Scale bar represents 100  $\mu\text{m}$ .
