# Supplementary material for: Maintenance of somatic tissue regeneration with age in short‐ and long‐lived species of sea urchins
Source: PubMed Central journal article supplement (PMC4933669; doi:10.1111/acel.12487), 2016-04-20
Supplement: ACEL-15-778-s008.pdf [file ACEL-15-778-s008.pdf]

**Fig. S8** Clustal W2: CLUSTAL 2.1 multiple sequence alignment of Vasa from *D. melanogaster*, *L. variegatus* and *S. purpuratus*.

Vasa, isoform A [*Drosophila melanogaster*] GenBank: AAF53438 (amino acids 16-433)  
 Vasa [*Lytechinus variegatus*] GenBank: ACM80368 (amino acids 42-433)  
 Vasa [*Strongylocentrotus purpuratus*] GenBank: NM\_001146193 or SPU\_008908 Peptide Sequence (amino acids 10-516)

```

Lv_Vasa      LRGGTSFEK----KSYGGSSSGFGSKANGFGIGVGRGRGRGRGFQSF AEQ--GGVGGLTN 95
Sp_Vasa      VSGGSSFGK----SSFGGSSG--GVKDDGFGVGVGRGRGRGRGFSPFASN--GGVGGMTN 61
Dm_Vasa      ARGGDWSDDEDTAKSFSGEAEGDGVGGSG--GEGGGYQGGNRDVFGRIGGGRRGGGAGGYRG 74
              **      .      .*:*.:.      *      .* * * *      *      *      :.      **.*.

Lv_Vasa      GTTNGTSNGGDSGWNPPS--NGTSSSPWDDSSSSGAGKRSFESKGSFSGG--GGGGRRGGR-- 152
Sp_Vasa      GTTNGGGES--SGGWDESPSKSGSSSSPWGGDGDNGFGKSSFGSK--SFGGRGGGGGGGGRRG 119
Dm_Vasa      GNRDGGGFHGGRRERGERDFRGGEGGFRRGGQGGSRGGQGGSRGGQGGFRG--GEGGFRGRL 132
              * . : * .      .      .:      .* ..      . . . . *      *      .: . * *      * * *      **

Lv_Vasa      -----DRGGRSFGDSENGGGG-----RSFX-- 172
Sp_Vasa      AESGGRRGGGGFGRREGGGGGGGGACYKQEEGHMARDCPNGDSSGGRRGGGDRSCYNC 179
Dm_Vasa      YENEDGDERRGRLDREERGGE-----RRGRLDREERGGGERGERGDGGFARRRRNE 182
              .      .      . . : **                                  *

Lv_Vasa      -----
Sp_Vasa      GETGHMSRECPTKDSSGGRRGGGGDRSCYNCGETGHMSRECPTKDSSGGGGGGGGKCFR 239
Dm_Vasa      DDIN----- 186

Lv_Vasa      -----RPEGEGGEAKPPASTYIPPPPSEEEEQIYMS--TXQGINFNRYDD 215
Sp_Vasa      CQEEGHFAKECPNPDTRNEGEGGEAKPPASTYVPPDPSEEEESQIYIS--TEQGINFNKYDD 298
Dm_Vasa      -----NNNNIVEDVERKREFYIPPEPSNDAIEIFSSGIASGIHFSKYNN 230
              . :.      :.:      . *:* * *: : : * *      .**:*.:*.:

Lv_Vasa      IPVEVSGRDGPKHIRSFEEAGLDETVLNVRKARYAKPTPVQKYAIP I I GAGLDLMACAQ 275
Sp_Vasa      IPVEVSGRDRPKNIRAFEEAELDETVLSNVRKAHYAKPTPVQKYGMPI I I SCGRDLMACAQ 358
Dm_Vasa      IPVKVTGSDVPQPIQHFTSADLRD I I IDNVNKSQYKIPTPIQKCSIPVISSGRDLMACAQ 290
              ***:*:* * * *: * * . * * : : : .**.*: *      ***:* * . : * : . *      *****

Lv_Vasa      TGSGKTA AFLLP I I TNMITQSGCVSCFSV VQEPLALIVSPTRELASQIQNEARKFCRNTS 335
Sp_Vasa      TGSGKTA AFLLP I I TNMITHGGCISTFNVIQEPLALIVSPTRELAIQIYNEARKFCRGTT 418
Dm_Vasa      TGSGKTA AFLLP I I LSKLLEDP----HELELGRPQVVIVSPTRELAIQIFNEARKFAFESY 346
              *****: : : : .      : * . : ***** * * ***** . :

Lv_Vasa      LRPVVIYGGTSVSHQTREVQNGCSILVATPGRMHDFIGRGIYIGLGKLYLILDEADRMVD 376
Sp_Vasa      IRPVVYGGTSVSHQMRECQKCSILVATPGRMHDFVTRGIYIGLGKLYLILDEADRMLD 478
Dm_Vasa      LKIGIVYGGTSFRHQNECITRGCHVVIATPGRLLDFVDRTFITFEDTRFVVLDEADRMLD 406
              : : : : ***** . * * .      . * * : : ***** : * * * : . : : : ***** : *

Lv_Vasa      MGFGPEIQKLIDHPHMPKGERQTLMF SATFPPEIQEK 433
Sp_Vasa      MGFGPDIQRLIEHPHMPAKGDRQTLMF SATFPNEVQEK 516
Dm_Vasa      MGFSEDMRRIMTHVTMRP--EHQTLMFSA----- 433
              *** . : : : : * * .      : : *****
  
```
