# Supplementary material for: Maintenance of somatic tissue regeneration with age in short‐ and long‐lived species of sea urchins
Source: PubMed Central journal article supplement (PMC4933669; doi:10.1111/acel.12487), 2016-04-20
Supplement: ACEL-15-778-s010.pdf [file ACEL-15-778-s010.pdf]

**Table S1** Average threshold cycle (Ct) values from qRT-PCR for cell proliferation, multipotency and control genes in sea urchin tissues (ALM- Aristotle’s lantern muscle, ES- esophagus, RN - radial nerve, Coel - coelomocytes, TF - tube feet and spines. Values are Ct  $\pm$  SEM (n=10 for all tissues except spines which are n=3 for Sp and n=6 for Lv).

**A – *S. purpuratus***

|                    | <b>ALM</b>     | <b>ES</b>      | <b>RN</b>      | <b>Coel</b>    | <b>TF</b>      | <b>Spines</b>  |
|--------------------|----------------|----------------|----------------|----------------|----------------|----------------|
| <i>pcna</i>        | 23.5 $\pm$ 0.2 | 23.1 $\pm$ 0.2 | 24.0 $\pm$ 0.2 | 23.8 $\pm$ 0.4 | 23.7 $\pm$ 0.4 | 23.0 $\pm$ 0.1 |
| <i>tert</i>        | 26.4 $\pm$ 0.2 | 27.2 $\pm$ 0.2 | 27.9 $\pm$ 0.2 | 28.2 $\pm$ 0.2 | 28.9 $\pm$ 0.5 | 28.9 $\pm$ 0.3 |
| <i>vasa</i>        | 24.9 $\pm$ 0.4 | 25.6 $\pm$ 0.1 | 26.7 $\pm$ 0.4 | 24.9 $\pm$ 0.3 | 25.8 $\pm$ 0.4 | 26.1 $\pm$ 0.1 |
| <i>seawi</i>       | 24.7 $\pm$ 0.3 | 25.1 $\pm$ 0.1 | 26.2 $\pm$ 0.4 | 25.2 $\pm$ 0.3 | 26.5 $\pm$ 0.7 | 26.5 $\pm$ 0.1 |
| <i>actin</i>       | 10.6 $\pm$ 0.3 | 16.9 $\pm$ 0.1 | 17.4 $\pm$ 0.8 | 22.4 $\pm$ 0.3 | 16.5 $\pm$ 0.5 | ND             |
| <i>profilin</i>    | 18.2 $\pm$ 0.3 | 19.2 $\pm$ 0.2 | 20.2 $\pm$ 0.3 | 19.1 $\pm$ 0.3 | 19.0 $\pm$ 0.5 | 18.1 $\pm$ 0.1 |
| <i>cyclophilin</i> | 17.4 $\pm$ 0.4 | 17.1 $\pm$ 0.2 | 18.8 $\pm$ 0.3 | 18.8 $\pm$ 0.4 | 18.4 $\pm$ 0.4 | 18.1 $\pm$ 0.5 |
| <i>RPL8</i>        | 18.8 $\pm$ 0.2 | 17.2 $\pm$ 0.2 | 18.8 $\pm$ 0.2 | 17.4 $\pm$ 0.4 | 18.6 $\pm$ 0.4 | 19.0 $\pm$ 0.3 |
| <i>ubiquitin</i>   | 17.6 $\pm$ 0.3 | 18.5 $\pm$ 0.3 | 18.5 $\pm$ 0.5 | 18.4 $\pm$ 0.4 | 21.0 $\pm$ 0.5 | 19.3 $\pm$ 0.5 |

**B – *L. variegatus***

|                    | <b>ALM</b>     | <b>ES</b>      | <b>RN</b>      | <b>Coel</b>    | <b>TF</b>      | <b>Spines</b>  |
|--------------------|----------------|----------------|----------------|----------------|----------------|----------------|
| <i>pcna</i>        | 24.9 $\pm$ 0.2 | 26.2 $\pm$ 0.4 | 26.0 $\pm$ 0.7 | 26.4 $\pm$ 0.6 | 25.8 $\pm$ 0.2 | 26.3 $\pm$ 0.4 |
| <i>tert</i>        | 25.9 $\pm$ 0.3 | 27.6 $\pm$ 0.2 | 29.0 $\pm$ 0.4 | 28.9 $\pm$ 0.4 | 30.1 $\pm$ 0.2 | 29.5 $\pm$ 0.4 |
| <i>vasa</i>        | 26.1 $\pm$ 0.2 | 27.2 $\pm$ 0.2 | 29.6 $\pm$ 0.5 | 29.2 $\pm$ 0.5 | 25.4 $\pm$ 0.1 | 25.2 $\pm$ 0.1 |
| <i>seawi</i>       | 25.6 $\pm$ 0.2 | 26.9 $\pm$ 0.2 | 28.6 $\pm$ 0.4 | 28.1 $\pm$ 0.5 | 28.3 $\pm$ 0.4 | 24.5 $\pm$ 0.2 |
| <i>actin</i>       | ND             | ND             | ND             | ND             | 18.7 $\pm$ 0.2 | 31.9 $\pm$ 0.6 |
| <i>profilin</i>    | 20.4 $\pm$ 0.1 | 22.4 $\pm$ 0.1 | 23.8 $\pm$ 0.6 | 24.1 $\pm$ 0.6 | 24.9 $\pm$ 0.1 | 22.5 $\pm$ 0.2 |
| <i>cyclophilin</i> | 19.6 $\pm$ 0.2 | 18.0 $\pm$ 0.2 | 21.2 $\pm$ 0.6 | 20.6 $\pm$ 0.6 | 23.2 $\pm$ 0.4 | 19.7 $\pm$ 0.1 |
| <i>RPL8</i>        | 18.2 $\pm$ 0.2 | 19.0 $\pm$ 0.3 | 21.8 $\pm$ 0.9 | 23.2 $\pm$ 0.8 | 20.5 $\pm$ 0.2 | 19.7 $\pm$ 0.1 |
| <i>ubiquitin</i>   | 13.7 $\pm$ 0.1 | 15.0 $\pm$ 0.1 | 19.5 $\pm$ 0.5 | 19.0 $\pm$ 0.5 | 20.0 $\pm$ 0.4 | 17.4 $\pm$ 0.1 |
| <i>gapdh</i>       | 22.4 $\pm$ 0.4 | 23.8 $\pm$ 0.6 |                | 27.0 $\pm$ 1.1 |                |                |

**C – *M. franciscanus***

|                    | <b>ALM</b>     | <b>ES</b>      | <b>RN</b>      |
|--------------------|----------------|----------------|----------------|
| <i>pcna</i>        | 25.4 $\pm$ 0.2 | 25.2 $\pm$ 0.4 | 24.6 $\pm$ 0.5 |
| <i>tert</i>        | 27.0 $\pm$ 0.2 | 27.6 $\pm$ 0.1 | 27.7 $\pm$ 0.3 |
| <i>vasa</i>        | 25.0 $\pm$ 0.2 | 26.3 $\pm$ 0.1 | 26.1 $\pm$ 0.4 |
| <i>seawi</i>       | 24.4 $\pm$ 0.1 | 26.0 $\pm$ 0.2 | 26.0 $\pm$ 0.2 |
| <i>actin</i>       | 12.2 $\pm$ 0.3 | 17.0 $\pm$ 0.2 | 16.2 $\pm$ 1.2 |
| <i>profilin</i>    | 25.9 $\pm$ 0.2 | 26.8 $\pm$ 0.2 | 26.9 $\pm$ 0.4 |
| <i>cyclophilin</i> | 21.5 $\pm$ 0.2 | 22.3 $\pm$ 0.2 | 21.0 $\pm$ 0.5 |
| <i>RPL8</i>        | 20.2 $\pm$ 0.1 | 20.3 $\pm$ 0.1 | 20.8 $\pm$ 0.4 |
| <i>ubiquitin</i>   | 18.7 $\pm$ 0.2 | 19.9 $\pm$ 0.2 | 20.6 $\pm$ 0.3 |
