# Supplementary material for: Maintenance of somatic tissue regeneration with age in short‐ and long‐lived species of sea urchins
Source: PubMed Central journal article supplement (PMC4933669; doi:10.1111/acel.12487), 2016-04-20
Supplement: ACEL-15-778-s011.pdf [file ACEL-15-778-s011.pdf]

**Table S2** Expression of *nanos2* in tissues of *L. variegatus* (Lv), *S. purpuratus* (Sp) and *M. franciscanus* (Mf). Values are given as the threshold cycle (Ct) for qRT-PCR. An average of 2 replicates of pooled cDNA from Lv (n=12), Sp (n=12) and Sf (n=10) were used for Aristotle's lantern muscle (ALM), esophagus (ES), radial nerve (RN) and coelomocytes (Coel). An average of 2 replicates of pooled cDNA from Lv (n=12) and Sp (n=3) tube feet (TF), and Lv (n=8) and Sp (n=3) spines. An average of 2 replicates of pooled cDNA from gonad (male, female and a mixture of male and female, n=2 for all species). Some tissues were not available for testing (ND).

|                     | <b>Lv – Ct</b> | <b>Sp – Ct</b> | <b>Mf – Ct</b> |
|---------------------|----------------|----------------|----------------|
| <b>ALM</b>          | 32.5           | 32.4           | 33.6           |
| <b>ES</b>           | 34.5           | 33.5           | 32.5           |
| <b>RN</b>           | 30.7           | 31.5           | 33.6           |
| <b>Coel</b>         | 32.3           | 30.7           | ND             |
| <b>TF</b>           | 35.3           | 36             | ND             |
| <b>Spines</b>       | 34.9           | 32.9           | ND             |
| <b>Female Gonad</b> | 20.4           | 21.2           | 21.3           |
| <b>Male Gonad</b>   | 24.1           | 26.0           | 23.5           |
| <b>Gonad (mix)</b>  | 21.6           | 22.1           | 21.5           |
