# Supplementary material for: Maintenance of somatic tissue regeneration with age in short‐ and long‐lived species of sea urchins
Source: PubMed Central journal article supplement (PMC4933669; doi:10.1111/acel.12487), 2016-04-20
Supplement: ACEL-15-778-s012.pdf [file ACEL-15-778-s012.pdf]

**Table S3** qRT-PCR primer sequences

| Target Gene         | GENE ID               | Primer Sequences                                                | Product size |
|---------------------|-----------------------|-----------------------------------------------------------------|--------------|
| Sp, Mf- <i>pcna</i> | SPU_023334            | (F) GCATTCCAGACACAGAATATGCA<br>(R) GGCTCAGATCTCGACAAATCCT       | 78           |
| Sp- <i>tert</i>     | SPU_026612            | (F) CTCTGCATCCCCAAAGACAAG<br>(R) GCTAATATGACATGATGGGATTCCCT     | 81           |
| Sp- <i>seawi</i>    | SPU_023335            | (F) CAAGGTCCTATGTAACGAGTCAGTACTAG<br>(R) TCTCGGAACCTGATGTTGTTTG | 81           |
| Sp- <i>vasa</i>     | SPU_008908            | (F) GAGGATGCATCAGCACCTTCA<br>(R) CGGGTTGGCGAGACGAT              | 64           |
| Sp- <i>nanos2</i>   | DQ286228<br>(GenBank) | (F) AACGGAGAGAGCGAGATGGTAT<br>(R) AGTATCGGGCAGGTTGTGATG         | 74           |
| Lv- <i>pcna</i>     |                       | (F) ATGTCATCATTAGCAGCACACTTTAA<br>(R) GACCAATTTAGATGTGATCGCAAT  | 96           |
| Lv- <i>tert</i>     |                       | (F) ACGTCGAGTGGACTTCAGAAGAC<br>(R) GCTTGGCCATCTCGATTAACCTG      | 88           |
| Lv- <i>seawi</i>    |                       | (F) TCCCGAGTTGTGCAGTCGTA<br>(R) GCGTGGCTAGATCCTTCATGA           | 77           |
| Lv- <i>vasa</i>     |                       | (F) GGTGAGCGTCAGACCCTGAT<br>(R) CGTTGAGGTACATCCTAGCCTTCT        | 76           |
| Lv- <i>nanos</i>    |                       | (F) ACAACAACGTAGTGTCAAATGCAA<br>(R) CGCTCCTCTCATCACTTTCGA       | 89           |
| Mf- <i>tert</i>     |                       | (F) GGGTGTGTTCTGTTTGTAGCT<br>(R) TCATCAATGTGTACCATCTCCTTCTACT   | 92           |
| Mf- <i>seawi</i>    |                       | (F) TGGGTGCTGGCTGCTGTT<br>(R) GCTACAGATGGCTTCCCTTCA             | 92           |
| Mf- <i>vasa</i>     |                       | (F) CTCGCAATGTTGGCATCCT<br>(R) CGGACGTGTCGGAAACCT               | 69           |
| Mf- <i>nanos</i>    |                       | (F) ACCGGGTTTCATGCCATTG<br>(R) CTCATCACCTTGGAGAGCTCAGT          | 68           |

|                         |            |                                                               |     |
|-------------------------|------------|---------------------------------------------------------------|-----|
| Sp Lv Mf <i>actin1</i>  | SPU_006797 | (F) GGTCAGGTCATCACTATTG<br>(R) GCTGTTGTATGTGGTCTC             | 111 |
| Sp- <i>ubiquitin</i>    | SPU_021496 | (F) ACACTTCATCTTGTTCTCAG<br>(R) GATGGAGTCACTTGGTTC            | 102 |
| Lv- <i>ubiquitin</i>    |            | (F) CCATCACTCTTGAGGTTGAG<br>(R) AGATGAGACGCTGCTGAT            | 99  |
| Mf- <i>ubiquitin</i>    |            | (F) GGATCTTAGCCTTTACATTCT<br>(R) ACTCTCCATCTCGTTCTC           | 124 |
| Sp- <i>profilin</i>     | SPU_020197 | (F) GGAAAAAGAAAGGTGAAGGATCAC<br>(R) TGGGCAATGACCGATTACAA      | 71  |
| Lv- <i>profilin</i>     |            | (F) TGCAGGCGAGTAAGACAGCTATA<br>(R) CTCCTTTATTCAAGTTCCCTTGCT   | 75  |
| Mf- <i>profilin</i>     |            | (F) CGCCAACCTCCTTTATTTGTATTCC<br>(R) TCTTTTTCCACTCTACAGCGATTG | 81  |
| Sp, Mf- <i>cyc7</i>     | SPU_008305 | (F) AGTTTCCATCGTGTCATC<br>(R) CTGTGATCCATTGGTGTT              | 180 |
| Lv- <i>cyclophilin7</i> |            | (F) CCTCCTTCCACAGGGTTATCC<br>(R) GTACCGTTGCCCTGGTAAA          | 67  |
| Sp, Mf- <i>rpl8</i>     | SPU_010692 | (F) GCCATGGTCGGAGTTGTTG<br>(R) TTGCGTTTGACCTTGTACTTGAA        | 92  |
| Lv- <i>rpl8</i>         |            | (F) GCCAACAGGGCCATGGT<br>(R) TTACGCTTGACCTTGTATTTGAAGTAG      | 104 |
| Lv- <i>gapdh</i>        |            | (F) CGAATCACCAAGGAAATC<br>(R) CAGCAGACTCTAAGGAAT              | 80  |

---
