# Supplementary material for: Maintenance of somatic tissue regeneration with age in short‐ and long‐lived species of sea urchins
Source: Aging Cell. 2016 Apr 20;15(4):778–87. doi: 10.1111/acel.12487 (PMC4933669; doi:10.1111/acel.12487)
Supplement: Supplementary file 2 — Fig. S2 Total number of cells counted and images for TUNEL analysis of sea urchin tissues. [file ACEL-15-778-s002.pdf]

Total number of cells counted for TUNEL analysis of sea urchin tissues

| TUNEL | ALM   |       | ES    |       | RN     |       |
|-------|-------|-------|-------|-------|--------|-------|
|       | Young | Old   | Young | Old   | Young  | Old   |
| Lv    | 46612 | 43969 | 89762 | 85889 | 108782 | 90941 |
| Sp    | 44768 | 47431 | 82109 | 80411 | 113574 | 68783 |
| Mf    | 45687 | 37714 | 84201 | 95374 | 110220 | 73316 |

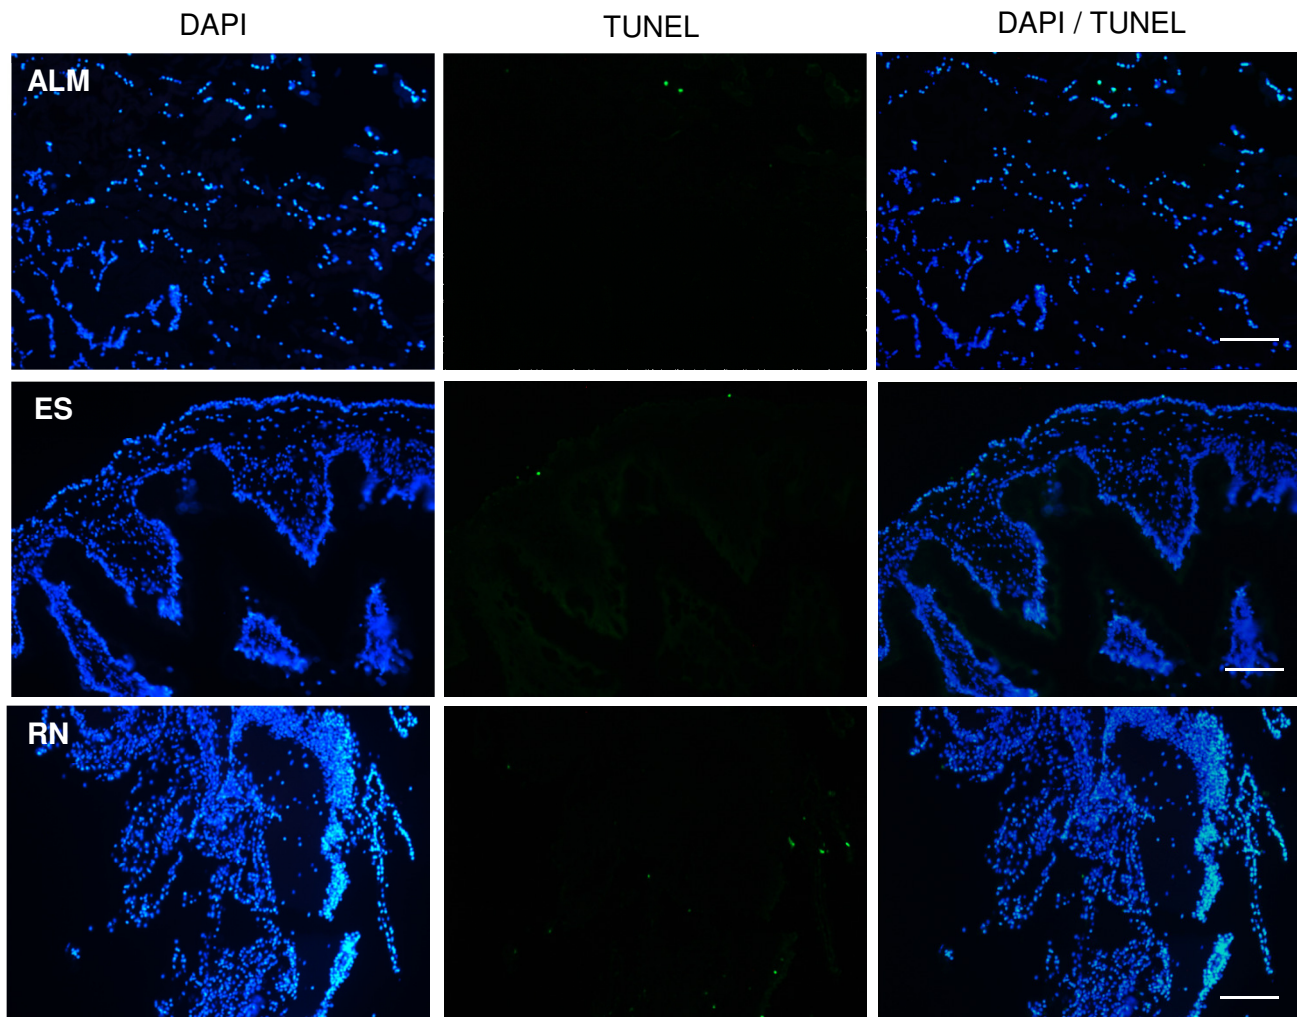

**Fig. S2** Total number of cells counted and images for TUNEL analysis of sea urchin tissues. Selection of images from *L. variegatus* tissues [Aristotle's lantern muscle (ALM), esophagus (ES), radial nerve (RN)] developed using the TUNEL assay and stained with DAPI. Scale bar represents 100  $\mu$ m.
